# Supplementary material for: Efficacy of an Intervention in the Nutritional Status and Consumption of Ultra-Processed Foods in Children With Obesity Treated in Primary Health Care in Brazil
Source: Research Square preprint supplement (doi:10.21203/rs.3.rs-6580042/v1), 2025-06-30
Supplement: Supplementary file 1 [file 5d03ee1a17b573faf654ec23.docx]

**Supplementary Table S1.** Randomization of Public Health Centers in the study Managing Childhood Obesity in the Context of Primary Health Care: A Multi-Component, Intensive, Intervention-Based Approach (Brazil, 2022).

| Type | Public Health Center (UBS) | Tertile |
| --- | --- | --- |
| Control | UBS 1 | 3 |
| UBS 2 | 3 |
| UBS 3 | 3 |
| UBS 4 | 2 |
| UBS 5 | 2 |
| UBS 6 | 2 |
| UBS 7 | 2 |
| UBS 8 | 3 |
| UBS 9 | 3 |
| UBS 10 | 2 |
| Intervention | UBS 11 | 3 |
| UBS 12 | 3 |
| UBS 13 | 3 |
| UBS 14 | 2 |
| UBS 15 | 2 |
| UBS 16 | 3 |
| UBS 17 | 2 |
| UBS 18 | 3 |
| UBS 19 | 2 |
| UBS 20 | 2 |

UBS: Public Health Centers in Brazil. 1st tertile: per capita income > BRL 440.60; 2nd tertile: income between BRL 440.60 and BRL 600.90; and 3rd tertile: income > BRL 600.90

**Supplementary Table S2.** Scheme of appointments of the study Managing Childhood Obesity in the Context of Primary Health Care: A Multi-Component, Intensive, Intervention-Based Approach (Brazil, 2022).

| MONTH 1 (baseline) - Nutrition | | | | |
| --- | --- | --- | --- | --- |
| Week | Control | Time | Intervention | Time |
| 1 | Individual appointment | 60 min | Individual appointment | 90 min |
| Apply a Questionnaire on Food and Beverage Consumption (QUPF) | Apply a Questionnaire on Food and Beverage Consumption (QUPF) |
| Nutritional assessment of the child | Nutritional assessment of the child |
| Apply 24-hour dietary recall | Apply 24-hour dietary recall |
| Apply Sociodemographic and Nutritional Assessment Questionnaire | Apply Sociodemographic and Nutritional Assessment Questionnaire |
| Apply the Community Food Environment questionnaire | Apply the Community Food Environment questionnaire |
| Apply Physical Activity and Sleep Practice questionnaire | Apply Physical Activity and Sleep Practice questionnaire |
| 2 |  |  | FNE in the household (booklet) | 30 min |
| 3 | Group FNE in health centers | 60 min | Group FNE in health centers | 120 min |
| 4 |  |  | Phone monitoring | 30 min |
| MONTH 2 (median 2 months after baseline) - Physical Activity | | | | |
| Week | Control | Time | Intervention | Time |
| 1 | Individual appointment | 60 min | Individual appointment | 90 min |
| Apply a Questionnaire on Food and Beverage Consumption (QUPF) | Apply a Questionnaire on Food and Beverage Consumption (QUPF) |
| 2 |  |  | FNE in the household (booklet) | 30 min |
| 3 | Group FNE in health centers | 60 min | Group FNE in health centers | 120 min |
| 4 |  |  | Phone monitoring | 30 min |
| MONTH 3 (median 4 months after baseline) - Sedentary Behavior | | | | |
| Week | Control | Time | Intervention | Time |
| 1 | Individual appointment | 60 min | Individual appointment | 90 min |
| Apply a Questionnaire on Food and Beverage Consumption (QUPF) | Apply a Questionnaire on Food and Beverage Consumption (QUPF) |
| Nutritional assessment of the child | Nutritional assessment of the child |
| Apply 24-hour dietary recall | Apply 24-hour dietary recall |
| Apply Sociodemographic and Nutritional Assessment Questionnaire | Apply Sociodemographic and Nutritional Assessment Questionnaire |
| Apply the Community Food Environment questionnaire | Apply the Community Food Environment questionnaire |
| Apply Physical Activity and Sleep Practice questionnaire | Apply Physical Activity and Sleep Practice questionnaire |
| 2 |  |  | FNE in the household (booklet) | 30 min |
| 3 | Group FNE in health centers | 60 min | Group FNE in health centers | 120 min |
| 4 |  |  | Phone monitoring | 30 min |
| MONTH 4 (median 7 months after baseline)- Sleep | | | | |
| Week | Control | Time | Intervention | Time |
| 1 | Individual appointment | 60 min | Individual appointment | 90 min |
| Apply a Questionnaire on Food and Beverage Consumption (QUPF) | Apply a Questionnaire on Food and Beverage Consumption (QUPF) |
| 2 |  |  | FNE in the household (booklet) | 30 min |
| 3 | Group FNE in health centers | 60 min | Group FNE in health centers | 120 min |
| 4 |  |  | Phone monitoring | 30 min |
| MONTH 5 (median 9 months after baseline) - Mental Health | | | | |
| Week | Control | Time | Intervention | Time |
| 1 | Individual appointment | 60 min | Individual appointment | 90 min |
| Apply a Questionnaire on Food and Beverage Consumption (QUPF) | Apply a Questionnaire on Food and Beverage Consumption (QUPF) |
| Nutritional assessment of the child | Nutritional assessment of the child |
| Apply 24-hour dietary recall | Apply 24-hour dietary recall |
| Apply Sociodemographic and Nutritional Assessment Questionnaire | Apply Sociodemographic and Nutritional Assessment Questionnaire |
| Apply the Community Food Environment questionnaire | Apply the Community Food Environment questionnaire |
| Apply Physical Activity and Sleep Practice questionnaire | Apply Physical Activity and Sleep Practice questionnaire |
| 2 |  |  | FNE in the household (booklet) | 30 min |
| 3 | Group FNE in health centers | 60 min | Group FNE in health centers | 120 min |
| 4 |  |  | Phone monitoring | 30 min |

**Supplementary Table S3.** Ultra-processed foods and beverages that made up the blocks of the questionnaire in the study Managing Childhood Obesity in the Context of Primary Health Care: A Multi-Component, Intensive, Intervention-Based Approach (Brazil, 2022).

| ULTRA-PROCESSED FOOD AND BEVERAGE QUESTIONNAIRE (QUPF) | | | |
| --- | --- | --- | --- |
| BREAKFAST / SMALL MEAL | LARGE MEALS | DESSERTS | BEVERAGES |
| - Diet/light cookies - Sweet cookies - Crackers and savory snacks - Breakfast cereals (such as *Sucrilhos*, *Superbom*, *Skarchitos*, or other) - Yogurts with fruits (e.g. strawberry, coconut, peach, vanilla flavor) - Soymilk powder (regular or diet/light) - Margarine (e.g. *Qualy*, *Becel*, *Claybom*, *Delicia*, or others) - Light margarine - Breads (sandwich bread loaf, hot dog bun, burger bun, or others) - Diet/light breads - Sweet breads (with cream, with sugar, or others) - Sweet breads, diet/light cakes - Ham | - Reconstituted meats (e.g. hamburger, hot dog) - Non-fat salt-based condiments (industrialized, ready-to-use seasoning) - Light processed meats (e.g. hot dog, sausage, bologna, ham, turkey breast) - Instant noodles (e.g. *Miojo*, Noodles, *Nissin, Cup Noodles*, or others) - Light/diet instant noodles - Sauces (e.g. shoyu, Worcestershire sauce, rosé sauce, garlic sauce, mayonnaise) - Ready-to-eat meals - Meat-based ready-to-eat meals (of any specific brand, such as *Sadia, Pif Paf, Perdigão, Aurora*, or others) - Light/diet ready-to-eat meals (of any specific brand, such as *Sadia, Pif Paf, Perdigão, Aurora*, or others) - Pasta-based ready-to-eat meals (of any specific brand, such as *Sadia, Pif Paf, Perdigão, Aurora*, or others) - Pizza (of any specific brand, such as *Sadia, Pif Paf, Perdigão, Aurora*, or other) - Industrialized soups and mixtures (of any brand, such as *Sopão, Maggi, Knorr, Kitano*, or others) - Tablets (condiments) and ready-to-use seasonings | - Chocolates, candies, lollipops etc. - Ice cream - Diet/light sweets - Other sweets | - Sodas - Diet/light soft drinks - Package juices (powder or to dilute) - Fruit juices or diet/light ready-to-drink teas |

**Supplementary Figure S1.** Classification and grouping of ultra-processed foods and beverages, evaluated in the study Managing Childhood Obesity in the Context of Primary Health Care: A Multi-Component, Intensive, Intervention-Based Approach (Brazil, 2022).

| First grouping: | | | | | | | | | | |
| --- | --- | --- | --- | --- | --- | --- | --- | --- | --- | --- |
| Diet/light dairy drinks; Yogurt-free dairy drinks; Yogurts with fruit; Soymilk powder (regular or diet /light) | Crackers and savory snacks | Diet/light cookies; Sweet cookies; Morning cereals | Margarine; Light margarine; Sauces | Breads; Diet/light breads; Sweet breads; Sweet breads and diet/light cakes | Ham; Reconstituted meats; Light processed meats; Meat-based ready-to-eat meals | Instant noodles; Light/diet instant noodles; Ready-to-eat meals; Light/diet ready-to-eat meals; Pasta-based ready-to-eat meals; Pizza; Industrialized soups and mixes | Non-fat salt-based condiments (industrialized, ready-to-use seasoning)  Tablets (condiments) and ready-to-use seasonings | Chocolate, candies, lollipops, etc.; Ice cream; Diet/light sweets; Other sweets | Soft drinks; diet/light soft drinks | Package juices (powder or to dilute); Fruit juices or diet/light ready-to-drink teas |
| DAIRY DRINKS | CRACKERS AND SAVORY SNACKS | SWEET COOKIES  AND CEREALS | MARGARINE | BREAD | PROCESSED MEATS | READY-TO-EAT MEALS | READY-TO-USE CONDIMENT | SWEETS | SOFT DRINKS | JUICES |
| FINAL GROUPING (GROUP NAME) | | | | | | | | | | |

**Supplementary Table S4.** Sociodemographic and anthropometric characteristics of the children who composed *the group 'losses during the study'*, evaluated in the study Managing Childhood Obesity in the Context of Primary Health Care: A Multi-Component, Intensive, Intervention-Based Approach (Brazil, 2022, n=73).

| Variables | Control n(%) | Intervention n(%) | p-value* |
| --- | --- | --- | --- |
| Sex |  |  |  |
| Female | 17(51.52) | 16(48.48) | 0.244 |
| Male | 26(65.00) | 14(35.00) |
| Race/color |  |  |  |
| Yellow | 1(100.00) | 0 | 0.110 |
| White | 13(76.47) | 4(23.56) |
| Indigenous | 0 | 1(100.00) |
| Brown (*Parda*) | 25(59.52) | 17(40.48) |
| Black | 4(33.33) | 8(66.67) |
| Mother's education |  |  |  |
| Did not attend school | 1(100.00) | 0 | 0.584 |
| Did not graduate elementary school | 0 | 1(100.00) |
| Graduated elementary school | 0 | 1(100.00) |
| Did not graduate high school | 6(75.00) | 2(25.00) |
| Graduated high school | 26(59.09) | 18(40.91) |
| Did not graduate higher education | 4(50.00) | 4(50.00) |
| Graduated higher education | 6(60.00) | 4(40.00) |
| Household income |  |  |  |
| No income | 2(66.67) | 1(33.33) | 0.989 |
| Up to BRL 606 | 2(66.67) | 1(33.33) |
| BRL 606 to BRL 1,212 | 5(62.50) | 3(37.50) |
| BRL 1,212 to BRL 1,818 | 10(58.82) | 7(41.18) |
| More than BRL 1,818 | 23(56.10) | 18(43.90) |
| Variables | CG Mean (95% CI) | IG Mean (95% CI) | p-value** |
| Age | 8.49 (8.05; 8.92) | 8.9 (8.38; 9.42) | 0.224 |
| Gross BMI | 26.00 (24.39; 27.60) | 26.73 (25.06; 28.39) | 0.534 |
| BMI (Z-score) | 2.97 (2.81; 3.14) | 3.00 (2.79; 3.20) | 0.844 |
| BMI: body mass index CI: Confidence Interval *Chi-square test; **t-test.  **Note:** value of the minimum wage considered: BRL 1,212.00 (one thousand, two hundred and twelve BRL) (Brazil, 2021). | | | |

**Supplementary Table S5.** Comparison between children who left the study and those who remained, evaluated in the study Managing Childhood Obesity in the Context of Primary Health Care: A Multi-Component, Intensive, Intervention-Based Approach (Brazil, 2022).

| Variables | **Remained in the study n(%)** 94(56.29) | Left the study n(%)  73(43.71) | p-value* |
| --- | --- | --- | --- |
| Sex |  |  |  |
| Female | 53(61.63) | 33(38.37) | 0.152 |
| Male | 41(50.62) | 40(49.38) |
| Race/color |  |  |  |
| Yellow | 3(75.00) | 1(25.00) | 0.639 |
| White | 17(50.00) | 17(50.00) |
| Indigenous | 0 | 1(25.00) |
| Brown (*Parda*) | 57(57.58) | 42(42) |
| Black |  |  |
| Mother's education¹ |  |  |  |
| Did not attend school | 0 | 1(100) | 0.130 |
| Did not graduate elementary school | 5(83.33) | 1(16.67) |
| Graduated elementary school | 11(91.67) | 1(8.33) |
| Did not graduate high school | 10(55.56) | 8(44.44) |
| Graduated high school | 50(53.19) | 44(46.81) |
| Did not graduate higher education | 8(50.00) | 8(50.00) |
| Graduated higher education | 9(47.37) | 10(52.63) |
| Household income² |  |  |  |
| No income | 0 | 3(100) | 0.338 |
| Up to BRL 606 | 5(62.50) | 3(37.50) |
| BRL 606 to BRL 1,212 | 14(63.64) | 8(36.36) |
| BRL 1,212 to BRL 1,818 | 20(54.05) | 17(45.95) |
| > BRL 1.818 | 53(56.38) | 41(43.62) |
|  |  |  |  |
| Variables | Remained in the study, mean (95% CI) | Left the study, mean (95% CI) | p-value** |
| Age | 8.45(8.18; 8.71) | 8.65(8.33; 8.99) | 0.316 |
| Gross BMI | 26.91(26.09; 27.73) | 26.30(25.15; 27.44) | 0.3761 |
| BMI (Z-score) | 3.15(3.02; 3.28) | 3.08(2.99; 3.17) | 0.072 |
| BMI: body mass index CI: Confidence Interval *Chi-square test; **t-test. | | | |
| ¹consider for mother's education: remained n = 93 and left n = 73 | | |  |
| ²consider for family income: remained n = 92 and left n = 72 | |  |  |
